# Supplementary material for: Disruption of NIPBL/Scc2 in Cornelia de Lange Syndrome provokes cohesin genome-wide redistribution with an impact in the transcriptome
Source: PubMed Central journal article supplement (PMC8316422; doi:10.1038/s41467-021-24808-z), 2021-07-27
Supplement: 41467_2021_24808_MOESM1_ESM.pdf [file 41467_2021_24808_MOESM1_ESM.pdf]

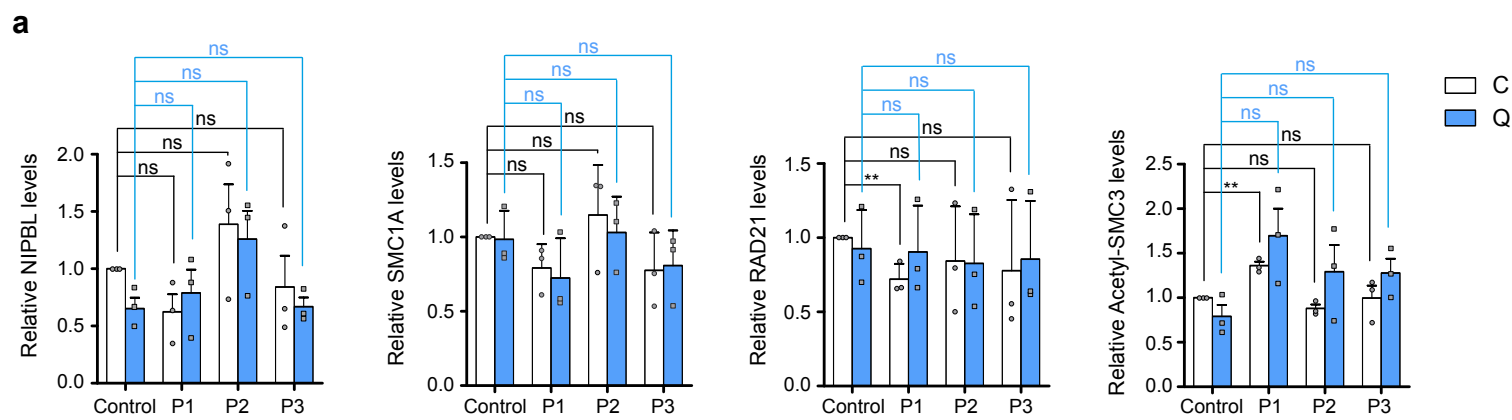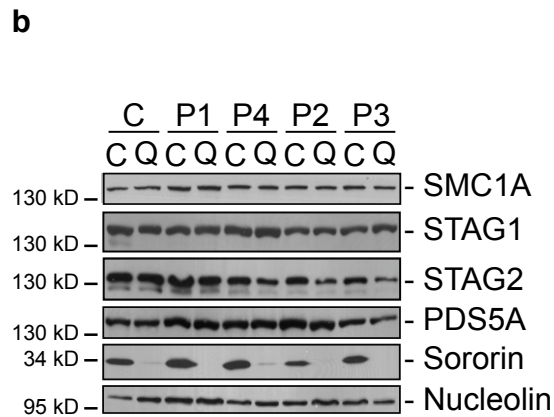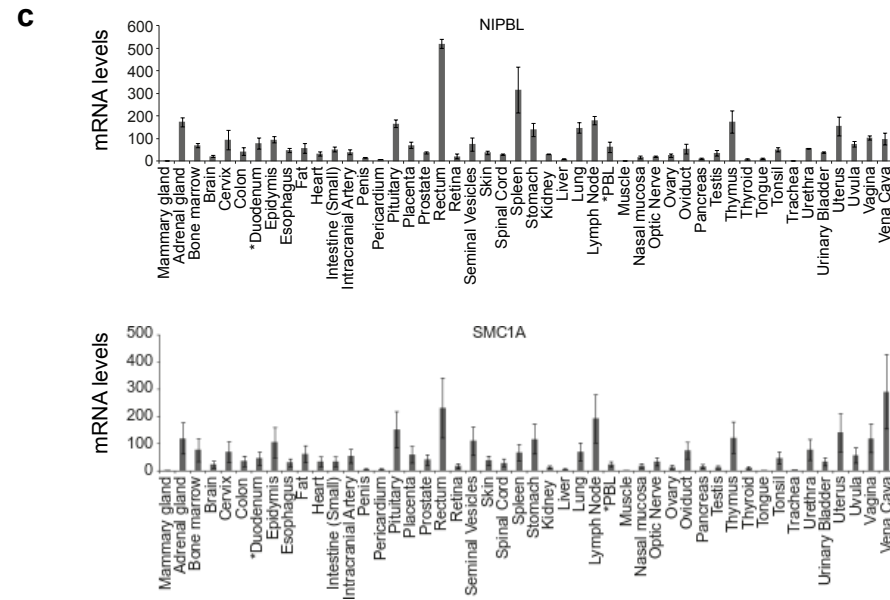

**Supplementary Figure 1. Cohesin and NIPBL protein levels are not affected in CdLS-derived cells. (a)** Quantification of protein levels of NIPBL, SMC1A, RAD21 and acetyl-SMC3 showed in Figure 1a in control and three CdLS patient (P1-3) derived cells under cycling (C, white) and quiescent (Q, blue) conditions in three biologically independent experiments. The graphs show the amount of each protein relative to actin levels. Means and SEMs are shown. Two-sided unpaired student's *t*-test (\*\**p* < 0.01; \**p* < 0.05). **(b)** Comparison of protein levels of SMC1A, STAG1, STAG2, PDS5A and sororin in control and four CdLS patient (P1-4) derived cells under cycling (C) and quiescent (Q) conditions. Nucleolin was used as loading control. Representative blots from one biological triplicate are shown. **(c)** mRNA expression levels of *NIPBL* and *SMC1A* measured by qPCR in a TissueScan, Human normal cDNA array (Human major Tissue qPCR array containing first-strand DNA from 48 tissues, HMRT304, Origene) in three biologically independent experiments. Means and SEMs are shown.

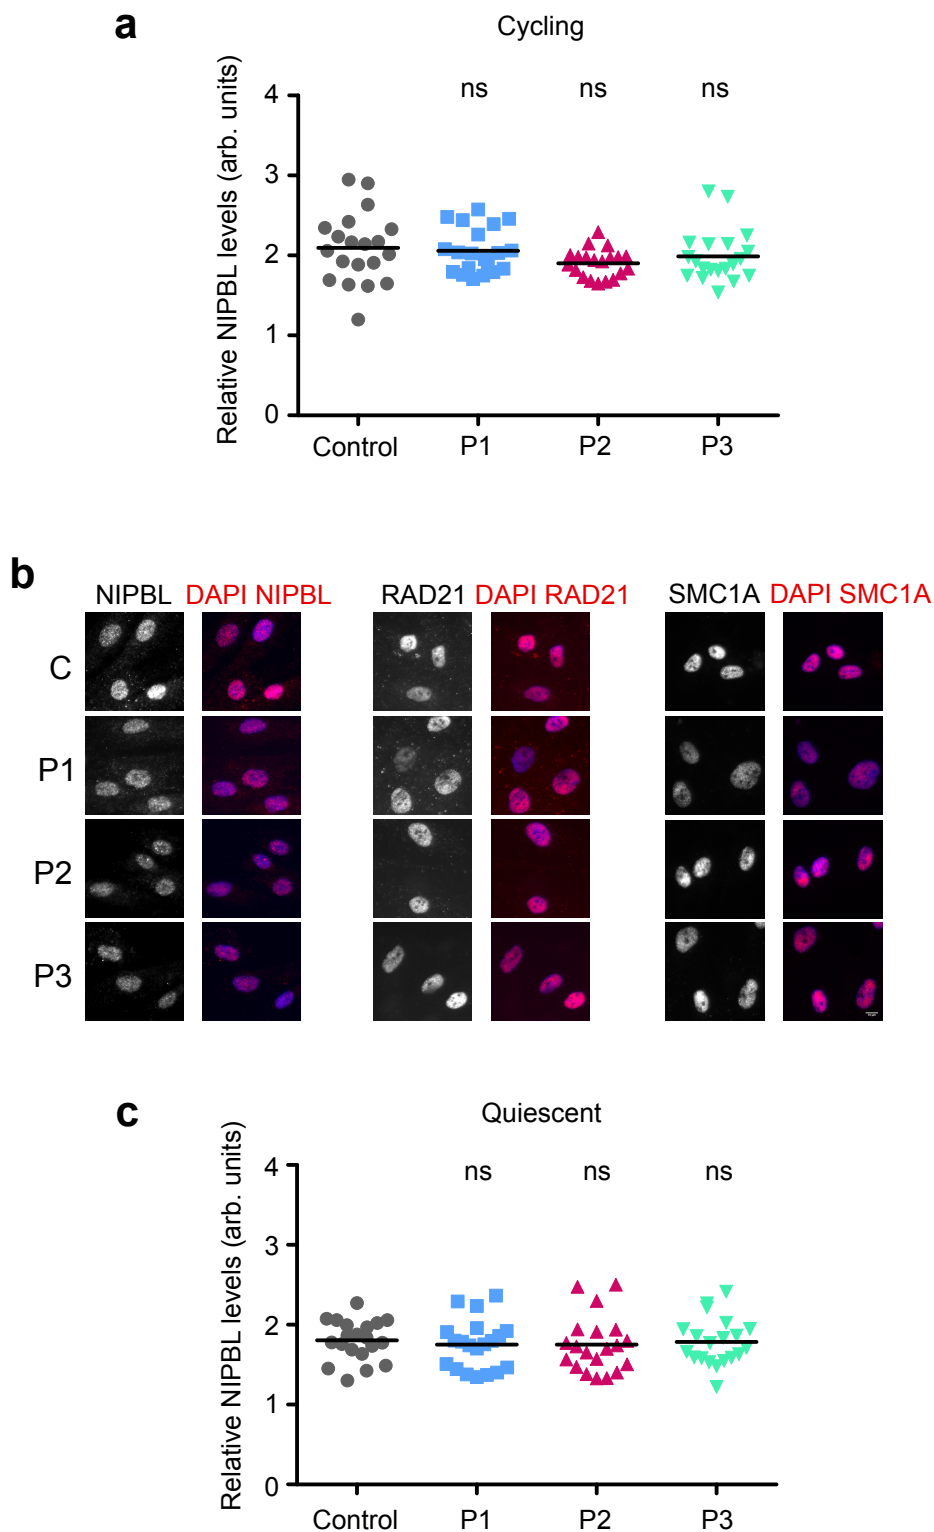

**Supplementary Figure 2. The localization of NIPBL and cohesin is not altered in quiescent CdLS-derived cells.** (a) Quantification of fluorescence levels of NIPBL showed in Figure 1c in control (grey) and three CdLS patient (P1, blue; P2, purple; P3, green)-derived cells (n=20 cells/sample over more than 3 biologically independent experiments) under cycling conditions. Means and SEMs are shown. Two-sided unpaired student's *t*-test. (b) Nuclear localization of NIPBL, RAD21 and SMC1A were monitored by immunofluorescence of a control (C) and three CdLS patient (P1-3)-derived fibroblasts under quiescent conditions. Nuclei were stained using DAPI. Representative images from one biologically independent replicate are depicted. Scale bar, 10  $\mu$ m. (c) Quantification of fluorescence levels (from (b)) of NIPBL in control (grey) and three CdLS patient (P1, blue; P2, purple; P3, green)-derived cells (n=20 cells/sample over more than 3 biologically independent experiments) under quiescent conditions. Means and SEMs are shown. Two-sided unpaired student's *t*-test.

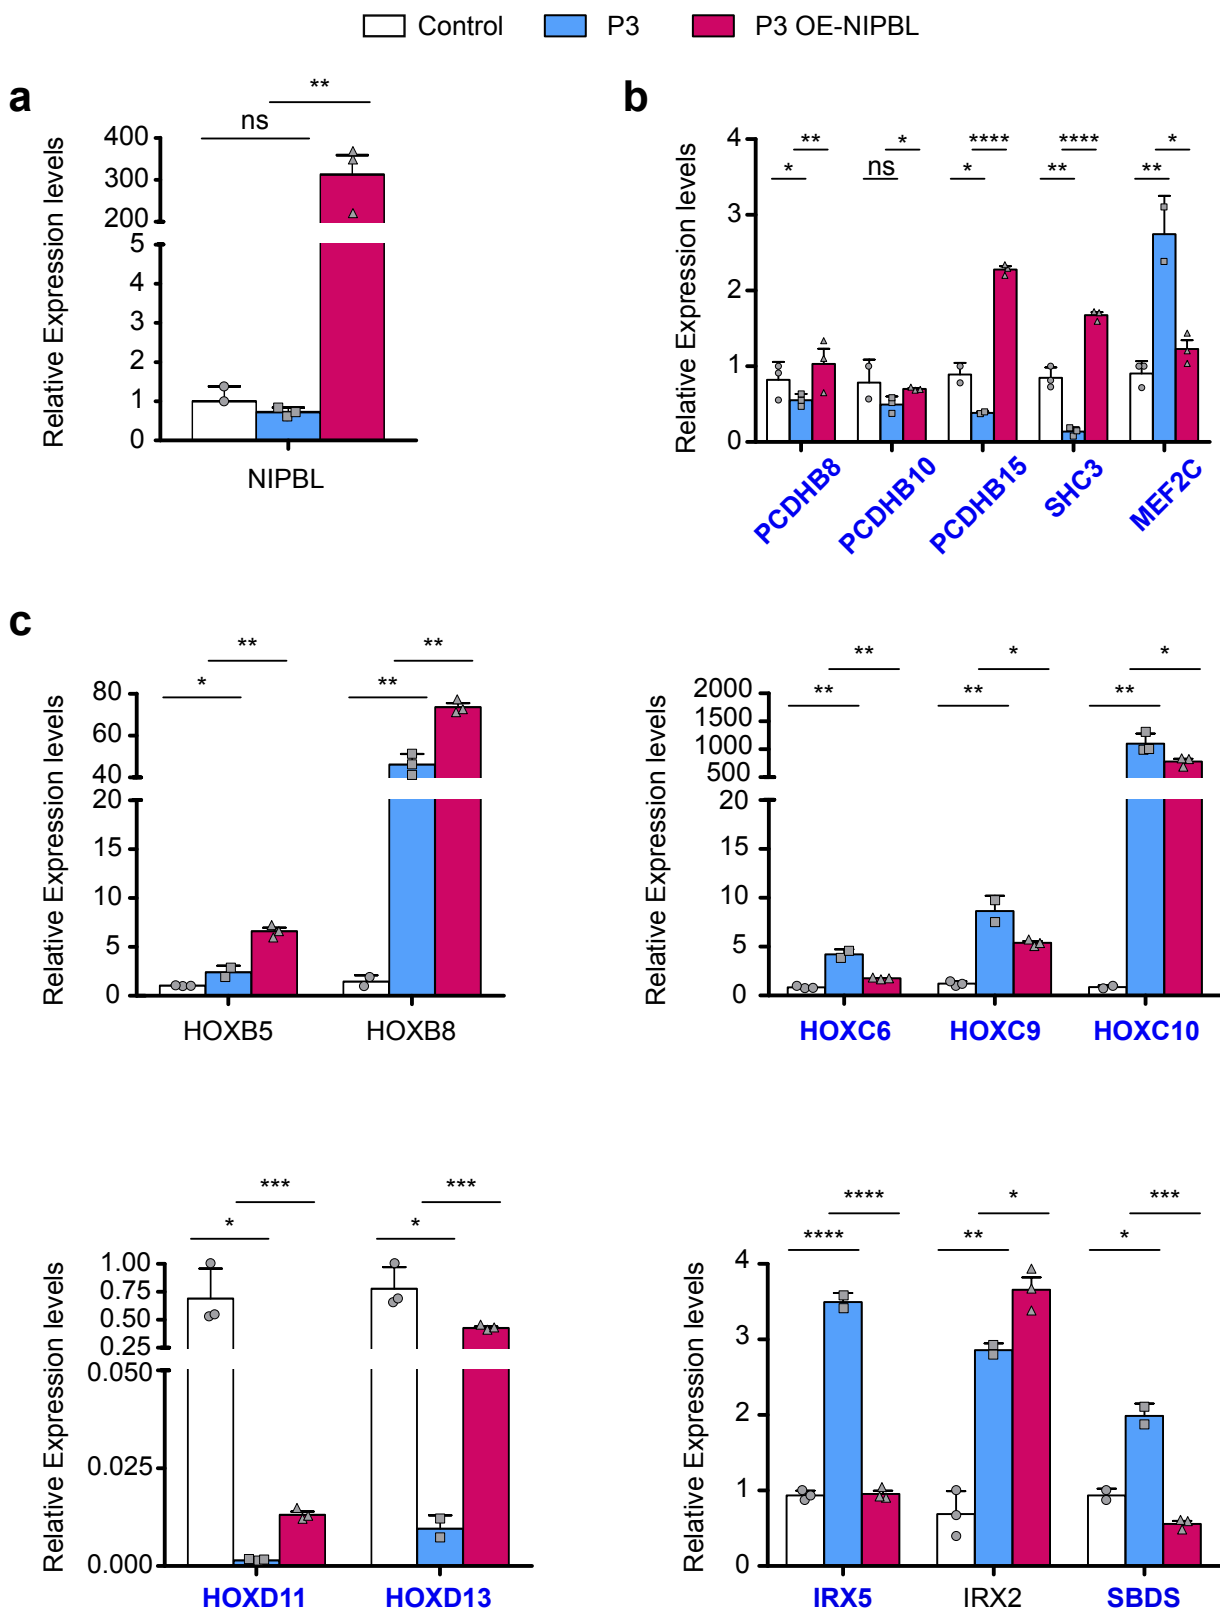

**Supplementary Figure 3. Overexpression of NIPBL restored the gene expression in *NIPBL*-deficient derived cells.** The mRNA expression levels of *NIPBL* (a), nervous system development genes (b), and embryonic development genes (c) were analyzed in a control (white) and CdLS patient-derived fibroblasts in basal conditions (P3, blue) or overexpressing *NIPBL* (P3 OE-*NIPBL*, purple) by reverse transcription-qPCR. The graphs show the amount of transcript of each gene relative to that in the control. Genes which expression is recovered are marked in dark blue. Means and SEMs were calculated from biological triplicates. Two-sided unpaired student's t-test (\*\*\*\*  $p < 0.0001$ ; \*\*\*  $p < 0.001$ ; \*\*  $p < 0.01$ ; \*  $p < 0.05$ ).

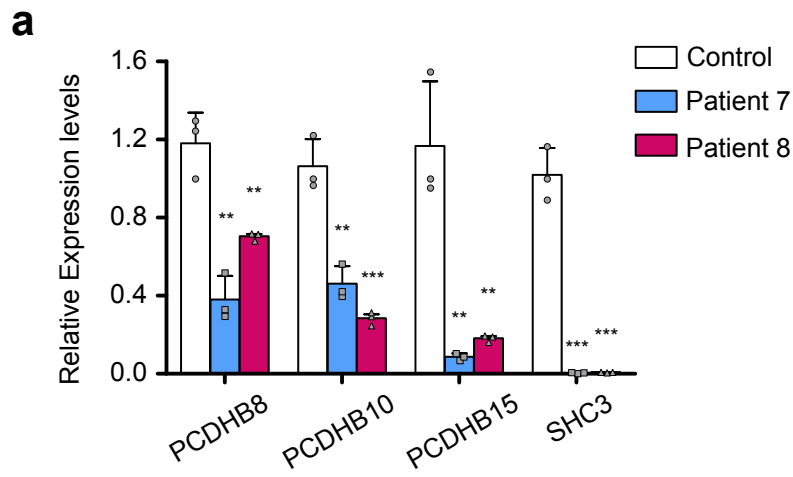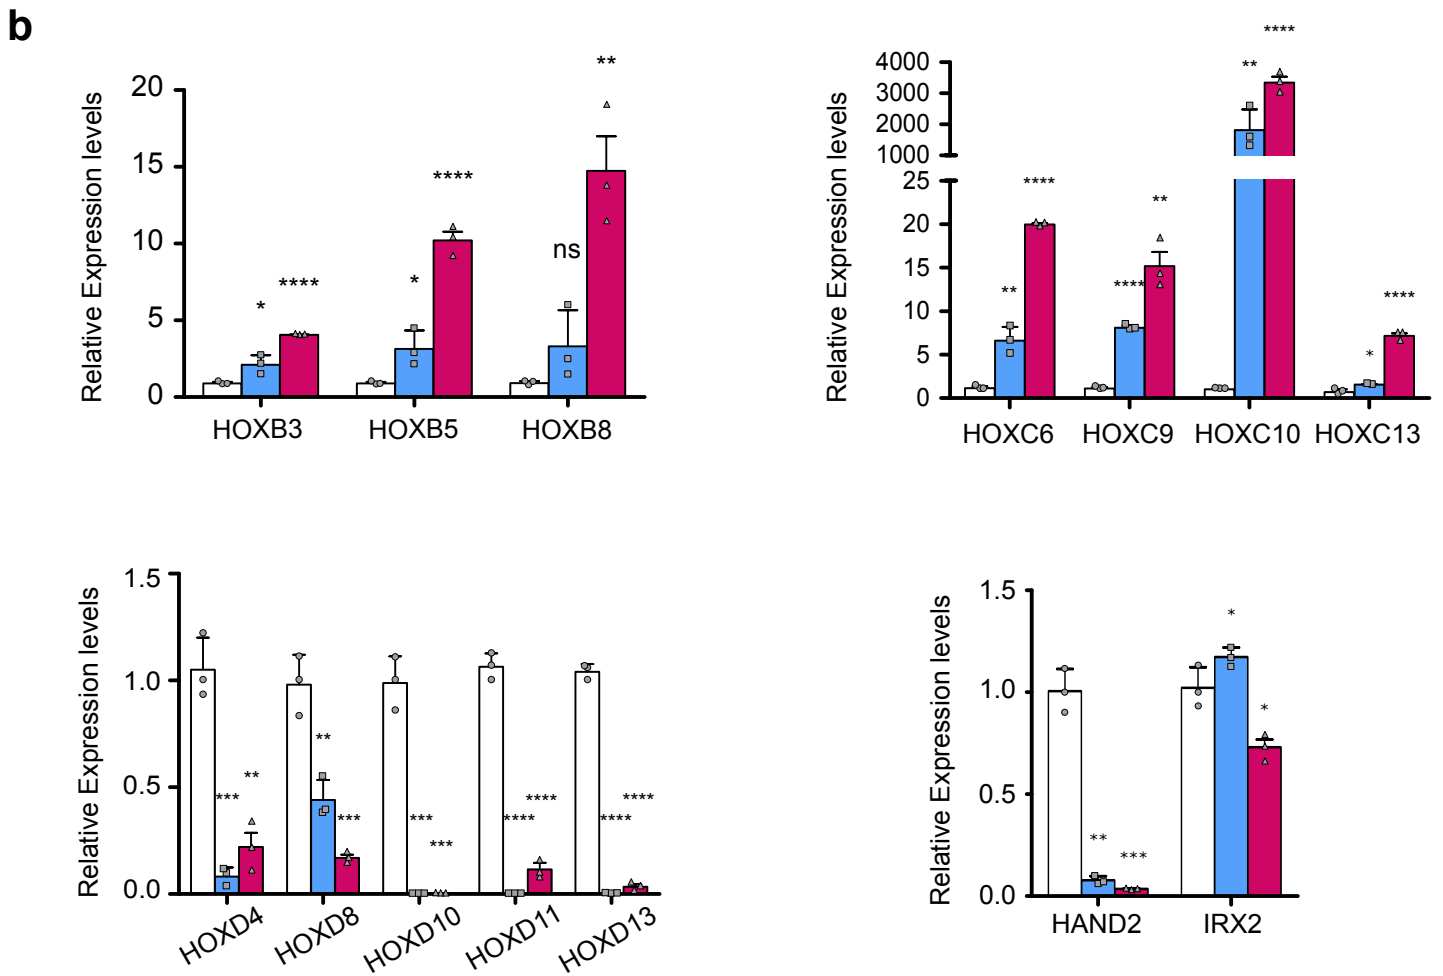

**Supplementary Figure 4. Genes involved in development and differentiation are deregulated in *SMC1A*-deficient derived fibroblast.** The mRNA expression levels of nervous system development genes (a) and embryonic development genes (b) were analyzed in a control (white) and two CdLS patient-derived fibroblast (P7, blue; P8, purple) with mutated-*SMC1A* by reverse transcription-qPCR. The graphs show the amount of transcript of each gene relative to that in the control. Means and SEMs were calculated from biological triplicates. Two-sided unpaired student's t-test (\*\*\*\*  $p < 0.0001$ ; \*\*\*  $p < 0.001$ ; \*\*  $p < 0.01$ ; \*  $p < 0.05$ ).

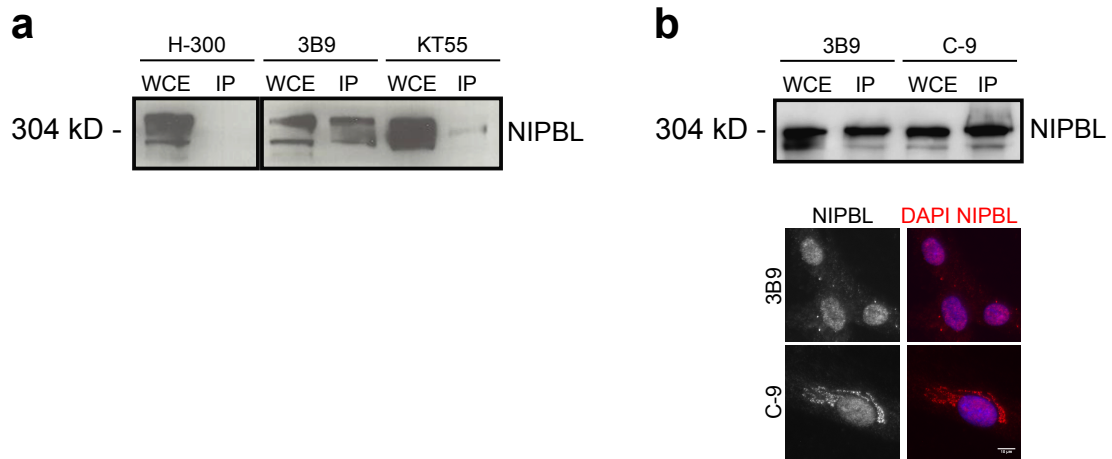

**Supplementary Figure 5. Characterization of NIPBL antibodies.** (a) Immunoprecipitation assays with three NIPBL commercial antibodies. Whole-cell extracts (WCEs) and the immunoprecipitation (IP) are shown. Representative blots from one biological triplicate are depicted. (b, upper panel) Immunoprecipitation assays with two commercial NIPBL antibodies, WCEs and the IP are shown. Representative blots from one biological triplicate are depicted. (b, bottom panel) Localization of NIPBL (grey channel) was monitored by immunofluorescence using two different NIPBL antibodies in control fibroblasts. Nuclei were stained using DAPI and merge signal (blue channel+ red channel) is shown. Scale bar, 10  $\mu$ m. Abnormal NIPBL localization is observed using the C-9 antibody. Representative images from one biological triplicate are shown.

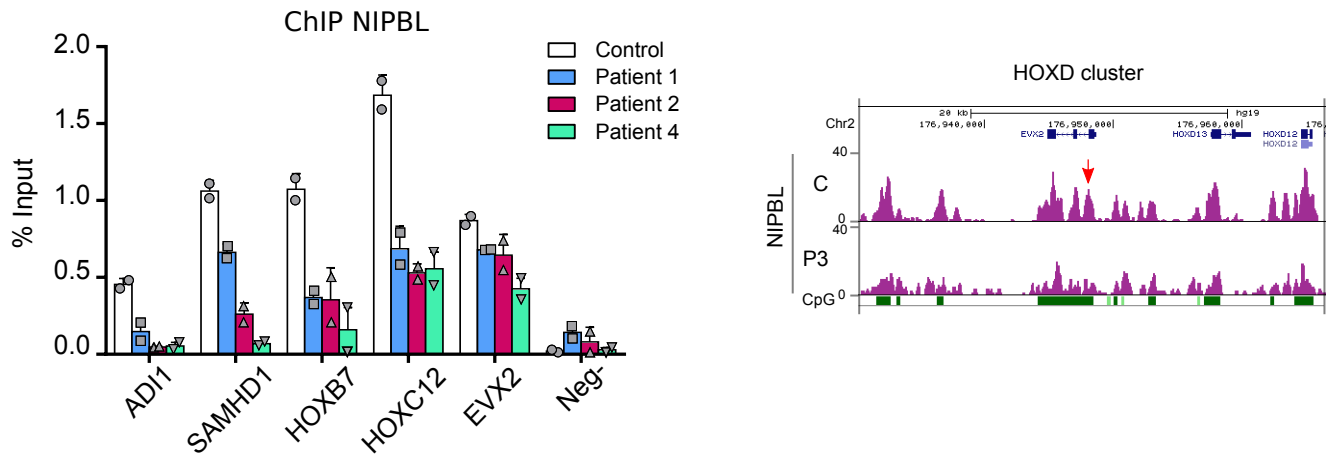

**Supplementary Figure 6. Validation of the reduction of NIPBL peaks by ChIP-qPCR experiments.** Cells from a control (white) and three CdLS-patients (P1, blue; P2, purple; P4, green) were used in ChIP-qPCR experiments to validate the NIPBL ChIP-Seq data using primers at the indicated genes. An intergenic region was used as a negative control (Neg -). Means and SEMs were calculated from biological duplicates (left). Snapshots of NIPBL peak distributions in control (C) and CdLS patient 3 cells around the HOXD cluster (right). The red arrows indicate the validated NIPBL peak around *EVX2* gene.

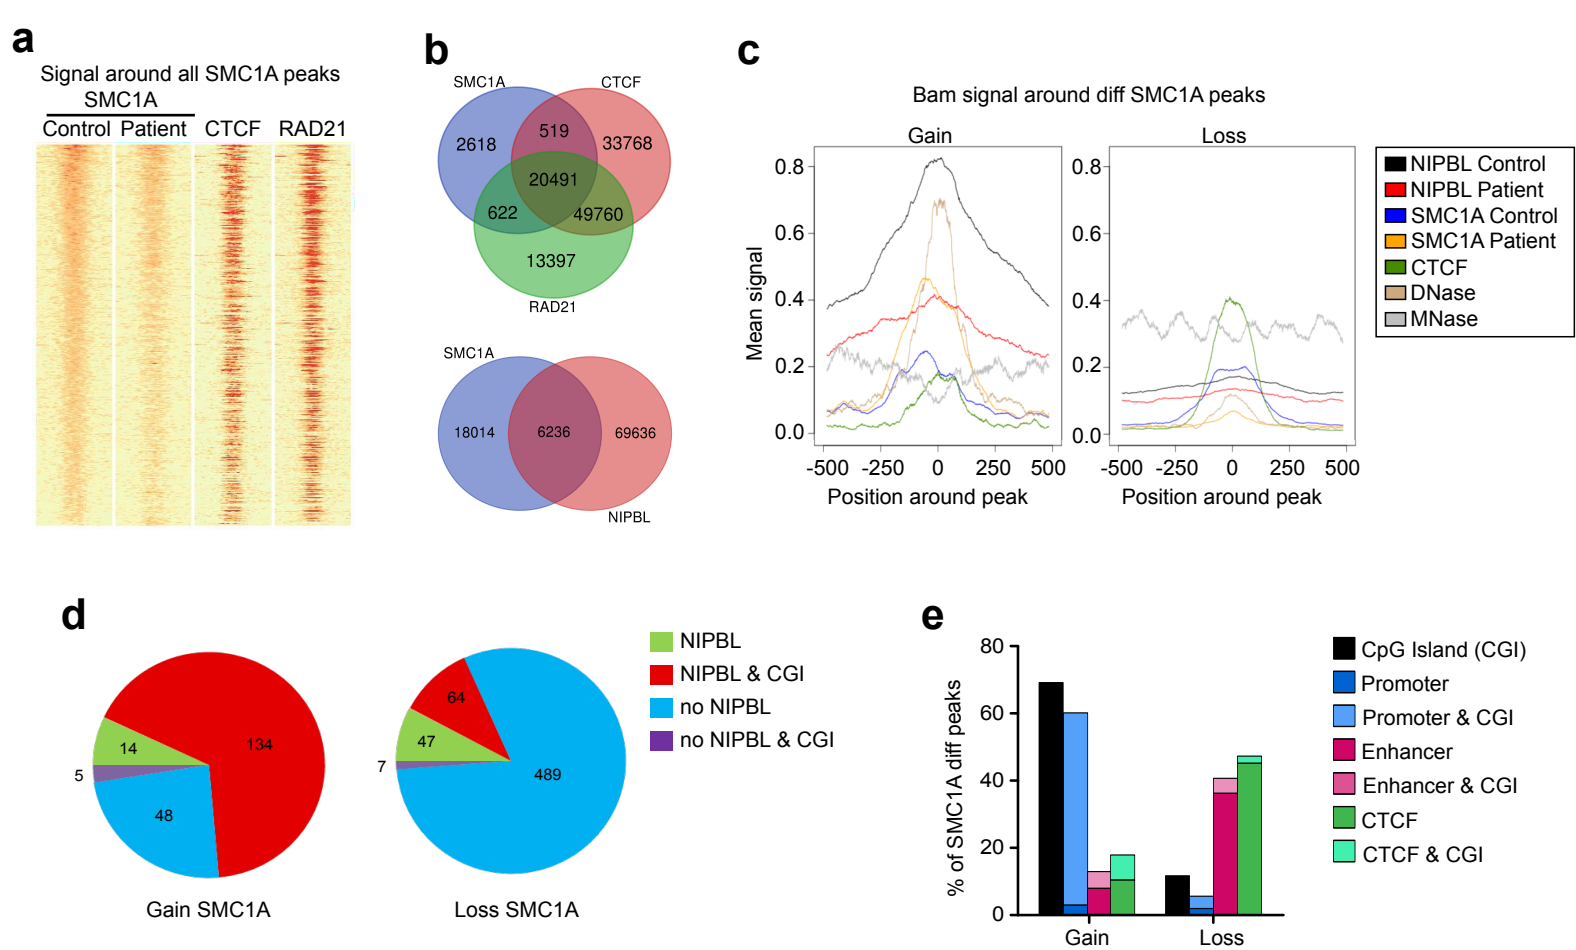

**Supplementary Figure 7. Genome-wide distribution of SMC1A in Patient 4-derived cells. (a)** Heatmap showing the signal around all SMC1A peaks in control and CdLS patient 4-derived cells and its co-localization with CTCF and RAD21 data from Encode. **(b)** Venn diagrams of SMC1A (dark blue) overlapping with CTCF (light red) and RAD21 (green) (upper) or SMC1A (dark blue) with NIPBL (light red) (bottom). **(c)** Bam graphs showing mean signal of the indicated proteins around gained (left) and lost (right) SMC1A differential peaks. NIPBL (Control, black; Patient, red), SMC1A (Control, blue; Patient, orange), CTCF (green) and MNase (grey). **(d)** Pie charts representing the overlap of gained (left) and lost (right) SMC1A peaks with NIPBL and CpG islands (CGI). NIPBL, green; NIPBL&CGI, red; no NIPBL, blue; no NIPBL&CGI, violet. **(e)** Plot showing the percentage of SMC1A gained and lost peaks that overlap with CpG islands (CGI, black), promoters (blue), enhancers (pink) and CTCF (green).

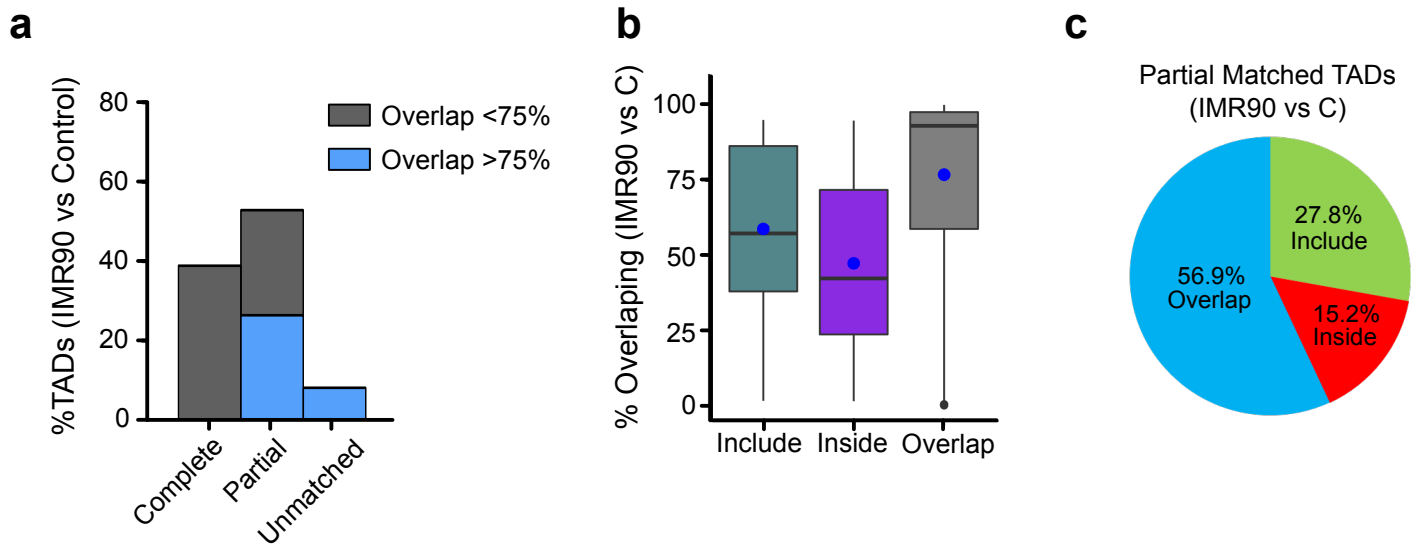

**Supplementary Figure 8. Comparison of the intra-TAD prediction tool with Hi-C data.** (a) Bar plots showing the percentage of experimental loops from IMR90 completely, partially matching or unmatching with the predicted intra-TAD loops from the control sample. Complete matching refers to a minimum of 95% reciprocal overlapping. Partial matching refers to full inclusion or partial overlap. The rest are unmatched TADs. TADs with an overlap of more than 75% (grey) are considered unchanged between the experimental and predicted loops. TADs with an overlap lower than 75% are considered different between the control and the patients (blue). (b) Boxplots showing the overlap percentage for partially matching TADs from (a) classified into include (dark green), inside (violet) and overlap (grey). Blue dots indicate the mean value in each case. Boxplots: center line, median; box limits, first and third quartiles; whiskers, 1.5x interquartile; points, outliers. (c) Pie plot representing the partial matching TADs from (a) classified into inside (red), include (green) and overlap (blue). 'Inside' refers to control predicted intra-TADs loops from the control residing inside an experimental loop, 'include' refers to control predicted intra-TADs loops including an experimental loop and 'overlap' refers to partial overlapping between both TADs.



**Supplementary Table 1. Summary of the clinical and molecular features on the CdLS patients in this study**

|                       | Patient 1                   | Patient 2                   | Patient 3                   | Patient 4                             | Patient 5                   | Patient 6                   | Patient 7                  | Patient 8                  | Control 1 | Control 2 | Control 3 | Control 4 |
|-----------------------|-----------------------------|-----------------------------|-----------------------------|---------------------------------------|-----------------------------|-----------------------------|----------------------------|----------------------------|-----------|-----------|-----------|-----------|
| <b>Gene Mutation</b>  | NIPBL<br>c.6647A>G p.Y2216C | NIPBL<br>c.8387A>G p.Y2796C | NIPBL<br>c.6647A>C p.Y2216S | NIPBL<br>c.5689_5691delAAT p.N1897del | NIPBL<br>c.6242G>C p.G2081A | NIPBL<br>c.8387A>G p.Y2796C | SMC1A<br>c.587 G>A p.R196H | SMC1A<br>c.2096G>T p.R699L | -         | -         | -         | -         |
| <b>Age (years)</b>    | 2                           | 10                          | 5                           | 16                                    | 11                          | 14                          | 10                         | 5                          | 3         | 11        | 30        | 30        |
| <b>Clinical Score</b> | 16                          | 5                           | 15                          | 13                                    | 14                          | 11                          | 13                         | 5                          |           |           |           |           |

**Clinical Score**    ≥11 points, classic CdLS  
                           9-10 points, non-classic CdLS  
                           4-8 points, molecular testing  
                           4 points, insufficient to indicate molecular testing CdLS

**Supplementary Table 2. Gene ontology analysis of the differential expression genes in CdLS-derived cells.** A pre-ranked Gene Set Enrichment Analysis (GSEA) was performed to separate upregulated biological processes in patients from those downregulated in patients. The log fold change values resulting from the DE analysis were used to rank the list of genes. GSEA software was run using 1000 gene permutations and a weighted gene enrichment statistic. Gene sets were limited to those containing between 15 and 500 genes (4116 gene sets). Gene sets with an FDR q-value < 0.25 were considered significantly enriched.

**Downregulated genes**

| NAME                                                                | SIZE | ES         | NOM p-val   | FDR q-val  |
|---------------------------------------------------------------------|------|------------|-------------|------------|
| GO_AXIS_ELONGATION                                                  | 30   | -0,6684479 | 0           | 0,12885292 |
| GO_REGULATION_OF_EPITHELIAL_TUBE_FORMATION                          | 18   | -0,7756181 | 0           | 0,1659859  |
| GO_CHONDROCYTE_DEVELOPMENT                                          | 30   | -0,6575674 | 0           | 0,16603169 |
| GO_REGULATION_OF_ANIMAL_ORGAN_FORMATION                             | 37   | -0,5755641 | 0           | 0,18566899 |
| GO_POSITIVE_REGULATION_OF_RHO_PROTEIN_SIGNAL_TRANSDUCTION           | 32   | -0,6539717 | 0           | 0,19572045 |
| GO_POSITIVE_REGULATION_OF_EPITHELIAL_CELL_DIFFERENTIATION           | 60   | -0,5464879 | 0           | 0,2096403  |
| GO_POSITIVE_REGULATION_OF_MESENCHYMAL_CELL_PROLIFERATION            | 25   | -0,6623802 | 0           | 0,21004179 |
| GO_NEGATIVE_REGULATION_OF_INTERLEUKIN_10_PRODUCTION                 | 18   | -0,6992185 | 0           | 0,23465733 |
| GO_CELLULAR_RESPONSE_TO_VITAMIN                                     | 30   | -0,6213291 | 0           | 0,23852745 |
| GO_KIDNEY_MESENCHYME_DEVELOPMENT                                    | 19   | -0,6903164 | 0,002702703 | 0,24239531 |
| GO_ESTABLISHMENT_OF_PLANAR_POLARITY_OF_EMBRYONIC_EPITHELIUM         | 17   | -0,7012875 | 0,002747253 | 0,19933875 |
| GO_LYMPHANGIOGENESIS                                                | 15   | -0,7596826 | 0,002857143 | 0,23817718 |
| GO_SMOOTH_MUSCLE_TISSUE_DEVELOPMENT                                 | 22   | -0,7045883 | 0,002906977 | 0,18820022 |
| GO_REGULATION_OF_WATER_LOSS_VIA_SKIN                                | 28   | -0,6244028 | 0,003003003 | 0,21334948 |
| GO_POSITIVE_REGULATION_OF_CARTILAGE_DEVELOPMENT                     | 32   | -0,5949158 | 0,003412969 | 0,22111532 |
| GO_POSITIVE_REGULATION_OF_EPIDERMIS_DEVELOPMENT                     | 38   | -0,5666513 | 0,003745318 | 0,22062744 |
| GO_ESTABLISHMENT_OF_PLANAR_POLARITY_INVOLVED_IN_NEURAL_TUBE_CLOSURE | 15   | -0,7450533 | 0,005181347 | 0,22725418 |
| GO_COCHLEA_MORPHOGENESIS                                            | 24   | -0,6434203 | 0,005830904 | 0,19489242 |
| GO_BRANCHED_CHAIN_AMINO_ACID_METABOLIC_PROCESS                      | 25   | -0,6265594 | 0,006269592 | 0,20241025 |
| GO_MALE_GENITALIA_DEVELOPMENT                                       | 23   | -0,6472099 | 0,006309148 | 0,19277942 |
| GO_BRANCH_ELONGATION_OF_AN_EPITHELIUM                               | 19   | -0,6843689 | 0,008426966 | 0,22365835 |
| GO_METANEPHRIC_MESENCHYME_DEVELOPMENT                               | 15   | -0,7078603 | 0,012376238 | 0,21861541 |

**Upregulated genes**

| NAME                                                                        | SIZE | ES         | NOM p-val | FDR q-val  |
|-----------------------------------------------------------------------------|------|------------|-----------|------------|
| GO_TRANSLATIONAL_INITIATION                                                 | 186  | 0,6677141  | 0         | 0,00100415 |
| GO_COTRANSLATIONAL_PROTEIN_TARGETING_TO_MEMBRANE                            | 101  | 0,70649254 | 0         | 0,00149344 |
| GO_ESTABLISHMENT_OF_PROTEIN_LOCALIZATION_TO_ENDOPLASMIC_RETICULUM           | 114  | 0,6835136  | 0         | 0,0039791  |
| GO_NUCLEAR_TRANSCRIBED_MRNA_CATABOLIC_PROCESS_NONSENSE_MEDIATED_DECAY       | 119  | 0,6526558  | 0         | 0,02491821 |
| GO_PROTEIN_LOCALIZATION_TO_ENDOPLASMIC_RETICULUM                            | 142  | 0,63437    | 0         | 0,04248601 |
| GO_PROTEIN_TARGETING_TO_MEMBRANE                                            | 200  | 0,6028843  | 0         | 0,09762804 |
| GO_ANTIGEN_PROCESSING_AND_PRESENTATION_OF_EXOGENOUS_PEPTIDE_ANTIGEN_VIA_MHC | 79   | 0,65239376 | 0         | 0,10408586 |
| GO_ANTIGEN_PROCESSING_AND_PRESENTATION_OF_PEPTIDE_ANTIGEN_VIA_MHC_CLASS_I   | 98   | 0,6297476  | 0         | 0,13729887 |
| GO_ANTIGEN_PROCESSING_AND_PRESENTATION_OF_ENDOGENOUS_ANTIGEN                | 23   | 0,7702922  | 0         | 0,1576319  |
| GO_NUCLEAR_TRANSCRIBED_MRNA_CATABOLIC_PROCESS                               | 206  | 0,5899598  | 0         | 0,15863375 |
| GO_MITOTIC_SPINDLE_ORGANIZATION                                             | 117  | 0,6093301  | 0         | 0,18598533 |
| GO_CYTOPLASMIC_TRANSLATION                                                  | 97   | 0,62129056 | 0         | 0,19238794 |
| GO_RESPONSE_TO_INTERLEUKIN_12                                               | 50   | 0,6585492  | 0         | 0,20237195 |
| GO_NEGATIVE_REGULATION_OF_NATURAL_KILLER_CELL_MEDIATED_IMMUNITY             | 17   | 0,7722237  | 0         | 0,20947562 |
| GO_VIRAL_GENE_EXPRESSION                                                    | 191  | 0,5818275  | 0         | 0,2116505  |
| GO_ANAPHASE_PROMOTING_COMPLEX_DEPENDENT_CATABOLIC_PROCESS                   | 82   | 0,6220927  | 0         | 0,2167282  |
| GO_RNA_CATABOLIC_PROCESS                                                    | 408  | 0,54527813 | 0         | 0,23730034 |
| GO_T_CELL_RECEPTOR_SIGNALING_PATHWAY                                        | 197  | 0,5652017  | 0         | 0,24210757 |

**Supplementary Table 3: List of primers used in this study**

| Name            | Sequence              | Use                |
|-----------------|-----------------------|--------------------|
| PCDH8 FW        | CGAATGAGTTCAGTTCCTGA  | Expression         |
| PCDH8 RV        | CTGAAACCAAGCCATTCTCT  | Expression         |
| PCDH10 FW       | CGGGACCAAGTGAAGTCAAGT | Expression         |
| PCDH10 RV       | TCCAAGCTATTCGGAAGG    | Expression         |
| PCDH15 FW       | CCCAATATTGTAAGCCAGGA  | Expression         |
| PCDH15 RV       | AACAGACGGTGGAAAGCTA   | Expression         |
| HOXB3 FW        | CTTTTCTGCCTGCTGCTGTC  | Expression         |
| HOXB3 RV        | ATTGGAGATGACCCCATCAA  | Expression         |
| HOXB5 FW        | CGCTGGCTGCTATTTTC     | Expression         |
| HOXB5 RV        | CAAGCCCTCTGCTTCTGTC   | Expression         |
| HOXB8 FW        | CAAGCTTGCACTGCTGCTA   | Expression         |
| HOXB8 RV        | GGCAATTTCTACGGCTACGA  | Expression         |
| HOXC6 FW        | CAGACCCTGGAACTGGAGAA  | Expression         |
| HOXC6 RV        | ATCTGTGCTCGGTGAGG     | Expression         |
| HOXC9 FW        | ACCTCTAGCGTCCAGGTTT   | Expression         |
| HOXC9 RV        | CGAAGCTACAGGACGGAAAA  | Expression         |
| HOXC10 FW       | AACATCTGGAATCGCCTCAG  | Expression         |
| HOXC10 RV       | GCTCTGCTCCGCTTGTATT   | Expression         |
| HOXC13 FW       | CTTCGGGGGACGCTACTAC   | Expression         |
| HOXC13 RV       | GACGGCTCCGGTATTTATC   | Expression         |
| HOXD4 FW        | CAGGGCCCGGACTACTAC    | Expression         |
| HOXD4 RV        | AAAGGCTGCTCACCAGAGT   | Expression         |
| HOXD8 FW        | CCCTCACCAGAGACAGGTA   | Expression         |
| HOXD8 RV        | CGGGAAATTTGCTCTGTGG   | Expression         |
| HOXD10 FW       | GTTCCCGTCCCTGGATATTT  | Expression         |
| HOXD10 RV       | GTTCCCGTCCCTGGATATTT  | Expression         |
| HOXD11 FW       | GACTTCGCTAGCAAGCCTTC  | Expression         |
| HOXD11 RV       | GGAGCCAGGTTGGAAGAGTA  | Expression         |
| HOXD13 FW       | CTCCCCAGCCAAAGAGT     | Expression         |
| HOXD13 RV       | GCCGAAGTGGTAGCCGTAG   | Expression         |
| HAND2 FW        | ATACTGGGGCTGTAGGACA   | Expression         |
| HAND2 RV        | GCCATGAGGAGAACCCCTAC  | Expression         |
| IRX2 FW         | GCCCAGGTCACTTGTCTC    | Expression         |
| IRX2 RV         | TGCTAGCCATCATCCAAG    | Expression         |
| ANKRD26 FW      | AAATCTCTCCCTCGGGTTAC  | SMC1A CHIP         |
| ANKRD26 RV      | CATGGAGCACACTTGACCAC  | SMC1A CHIP         |
| ACTN4 FW        | CGGGCTGAAGCAGCTGAA    | SMC1A CHIP         |
| ACTN4 RV        | GCCGTAAGTGGTACGACTGGT | SMC1A CHIP         |
| CBX5 FW         | CGTCTGCCCTGTTCTGTAT   | SMC1A CHIP         |
| CBX5 RV         | GCGGGAGTTTGTCTAGCTT   | SMC1A CHIP         |
| PHF12 FW        | AGCGCACTGAGACAAAAGG   | SMC1A CHIP         |
| PHF12 RV        | TTTGACACAAAACCAATG    | SMC1A CHIP         |
| TUBD1 FW        | TATGGTACGCTAGCTCACTG  | SMC1A CHIP         |
| TUBD1 RV        | GTGGACATGCGCAGAACTAT  | SMC1A CHIP         |
| LOC100507642 FW | ACGCCATAGTCACTCATCA   | SMC1A CHIP         |
| LOC100507642 RV | GAAGCAATGGGGGAGGAC    | SMC1A CHIP         |
| FAM98A FW       | GGAACTCCAAATCCACAGC   | SMC1A CHIP         |
| FAM98A RV       | CGGGCCCTGTAATCTTTAG   | SMC1A CHIP         |
| CCDC12 FW       | CGGCAGCTGTCTTCTTAT    | SMC1A CHIP         |
| CCDC12 RV       | GCAAGGTGAGAAGTGTGGAG  | SMC1A CHIP         |
| ADI1 FW         | ACACCCAGGCAACAGAAAC   | SMC1A & NIPBL CHIP |
| ADI1 RV         | AGCGAAGTTTACGGGGTTG   | SMC1A & NIPBL CHIP |
| N6AMT1 FW       | GCTGTACACGTCGCTGAAG   | SMC1A CHIP         |
| N6AMT1 RV       | GAACGCAAGGAAAGACTATG  | SMC1A CHIP         |
| Neg- FW         | AAAGTGGCACCCGTGTAAG   | SMC1A & NIPBL CHIP |
| Neg- RV         | CCTATCCTCACCCCATTTT   | SMC1A & NIPBL CHIP |
| HOXB4 FW        | CACAGGGCTAGAGGGAGAGTT | SMC1A CHIP         |
| HOXB4 RV        | CCGCCTTAGACCAAGTTTAC  | SMC1A CHIP         |
| HOXB5 CHIP FW   | GAGAATCGTTAGGGCCGATT  | SMC1A CHIP         |
| HOXB5 CHIP RV   | GCCAAAGCCAACTTCTCTC   | SMC1A CHIP         |
| HOXB8 CHIP FW   | CTCCAGGGAGTTTACATGG   | SMC1A CHIP         |
| HOXB8 CHIP RV   | GCTGCTCTCCCAAAAACCTG  | SMC1A CHIP         |
| HOXC5 FW        | CCCCAATTCCAAGAACCTTT  | SMC1A CHIP         |
| HOXC5 RV        | TCTCGATATGTTGGCAAAGC  | SMC1A CHIP         |
| HOXC8 FW        | GAGGTTCTTCTCCCACTT    | SMC1A CHIP         |
| HOXC8 RV        | CATTTGGTCCAATGCAGTCC  | SMC1A CHIP         |
| EVX2 FW         | CGGGCACACTCAGAGAGG    | SMC1A CHIP         |
| EVX2 RV         | TTAGTAAGACGGCCGTGAGC  | SMC1A CHIP         |
| HOXD4 CHIP FW   | TTCCCGCCTCTACTCT      | SMC1A CHIP         |
| HOXD4 CHIP RV   | CAGTCTGGGAAAGGAACC    | SMC1A CHIP         |
| PCDH16 FW       | GCGTGCAGGTTAAGATGAC   | SMC1A CHIP         |
| PCDH16 RV       | CGCTCTGGCTCAGTATTCT   | SMC1A CHIP         |
| PCDH10 CHIP FW  | CACACCCCAATGGGTACA    | SMC1A CHIP         |
| PCDH10 CHIP RV  | CTCAGAGCAATCCCAAACC   | SMC1A CHIP         |
| PCDH13 FW       | GTGCATACAGGACAGGTTGG  | SMC1A CHIP         |
| PCDH13 RV       | GGTTCTGGTTTGTGCTTCT   | SMC1A CHIP         |
| PCDH14 FW       | GGTGGCGCTACAGGATAAGA  | SMC1A CHIP         |
| PCDH14 RV       | GTGGGTTGGATGTTTGTGT   | SMC1A CHIP         |
| TAD1 FW         | GCATTGCTTTGCTAGCTCT   | 3C                 |
| TAD1 RV         | GCCTCCCAAAGTGTGGTAT   | 3C                 |
| TAD2 FW         | AGATGACAGGCTTTGCTGCT  | 3C                 |
| TAD2 RV         | GGCTGGCAGACAGAGAGA    | 3C                 |
| TAD3 FW         | CCTACCCACTCACCTCCACA  | 3C                 |
| TAD3 RV         | AAGAGCGAAACTCCGTCTCA  | 3C                 |
| TAD4 FW         | AATAGGGCACTGAAGGATGG  | 3C                 |
| TAD4 RV         | CTTGGCTTCCGAAGTTCT    | 3C                 |
| TAD5 FW         | TGTGCAAACTCTGACCTGCT  | 3C                 |
| TAD5 RV         | GAAGTAGGCCACCCAGCAG   | 3C                 |
| TAD6 FW         | AGAAACCAGGGACACACAGC  | 3C                 |
| TAD6 RV         | AGGTGGGATGAGTTGGTGAG  | 3C                 |
| SAMHD1 FW       | ACTGACAGTTGAGCCCTTCG  | NIPBL CHIP         |
| SAMHD1 RV       | GGGATTGATTGAGGACGAC   | NIPBL CHIP         |
| HOXB7 FW        | CAGGGGTAGATCCGGAAGTT  | NIPBL CHIP         |
| HOXB7 RV        | GCCCTTTGAGCAGAACCTCT  | NIPBL CHIP         |
| HOXC12 FW       | CGGCTTCAAGTACGACTACG  | NIPBL CHIP         |
| HOXC12 RV       | GAGTCGGATTCCAGCGACT   | NIPBL CHIP         |
| EVX2 CHIP FW    | TGCTAGCTCGGTGAGCTTG   | NIPBL CHIP         |
| EVX2 CHIP RV    | CAGTCCATCCTCTTGTCTC   | NIPBL CHIP         |
